# Supplementary material for: Non-linear optical properties of 2,7-naphthyridine derivatives for optical switching applications: a DFT study
Source: Royal Society of Chemistry journal article supplement (doi:10.1039/d3nj04885c), 2024-01-01
Supplement: d3nj04885c1.pdf [file d3nj04885c1.pdf]

Cite this: DOI: 00.0000/xxxxxxxxxx

# Non-Linear Optical Properties of 2,7-Naphthyridine Derivatives for Optical Switching Application: A DFT Study<sup>†</sup>

Dhanya P.K.,<sup>a</sup> Prakash Chandran R.,<sup>b</sup> Sobha Vijayan Nair,<sup>c</sup> and Renjith Raveendran Pillai<sup>\*a,d</sup>

## 1 Supplementary information<sup>†</sup>

### 1.1 Structural details of studied compounds

2,7 naphthyridine, a donor moiety which is the parent compound and labelled as N. Then ten naphthyridine based structures are designed by using ethenyl bridge and nitrophenyl and triazine acceptors in the D- $\pi$ -A chromophore format and are labelled as N1-N10. The IUPAC name of the designed compounds are given below. N=2,7 Naphthyridine N1=4-[(E)-2-phenyl ethenyl]-2,7 naphthyridine N2=4-[(E)-2-(4-nitrophenyl) ethenyl]-2,7 naphthyridine N3=4-[(E)-2-(3,5-dinitrophenyl) ethenyl]-2,7 naphthyridine N4=4-[(E)-2-(2,4,6-trinitrophenyl) ethenyl]-2,7 naphthyridine N5=4-[(E)-2-(4-phenylphenyl) ethenyl]-2,7 naphthyridine N6=4-[(E)-2-[4-(2,4,6-trinitrophenyl) phenyl] ethenyl]-2,7 naphthyridine N7=4-[(E)-2-(4-[3,5-bis(4-nitrophenyl)-1,3,5-triazin-2-yl] phenyl) ethenyl]-2,7 naphthyridine N8=4-[(E)-2-4-[3,5-bis(4-nitrophenyl) phenyl] phenyl ethenyl]-2,7 naphthyridine N9=4-[(E)-2-[4-(4-nitrophenyl)-2,5-dipropoxy phenyl] ethenyl]-2,7 naphthyridine N10= 4-[(E)-2-[2,5-bis(tert-butoxy)-4-[(E)-2-(3,5-dinitrophenyl) ethenyl] phenyl] ethenyl]-2,7 naphthyridine.

### 1.2 Optimised geometry of studied compounds

The optimised geometry of parent compound N and designed compounds N1-N10 computed using DFT-B3LYP/6-311G(d p)

level of theory are shown in Fig. 1.

### 1.3 Comparison of theoretical and experimental bond length and bond angle

A comparison of theoretical and experimental values of selected bond length (Å) and bond angle (degree) of studied compounds N and N1-N10 are given in Table 1 and Table 2 respectively.

### 1.4 Polarization scan of HRS intensity

A polar graph is plotted between the normalized HRS intensity and polarisation angle  $\psi$  for parent compound N and designed compounds N1-N10 in gas phase for dynamic case (1064 nm and 1907 nm) are shown in Fig. 2.

### 1.5 HRS hyperpolarizability and depolarization ratio of studied compounds

The Static and Dynamic HRS hyperpolarizability ( $\beta_{HRS} \times 10^{-30}$  esu) and Depolarization Ratio (DR) for parent compound N and designed compounds N1-N10 computed at DFT-B3LYP/6-311G(d p) level of theory in gas phase are given in Table 3.

<sup>a</sup> Department of Physics, University College, University of Kerala, Thiruvananthapuram, Kerala, India- 695034

<sup>b</sup> Department of Chemistry, M.M.N.S.S. College, Kottiyam, Kollam, Kerala, India-691571

<sup>c</sup> School of Biotechnology, Amrita Vishwavidyapeetham, Amritapuri, Kollam, Kerala, India-690525

<sup>d</sup> Department of Physics, Government College, Kasargod, Kerala, India-671123, Tel: 8281560152; E-mail: drrenjith@universitycollege.ac.in; renjithkadavoor@gmail.com

<sup>†</sup> Electronic Supplementary Information (ESI) available: Structural details of studied compounds, Optimised geometry of parent compound N and designed compounds N1-N10, Theoretical and experimental values of selected bond length (Å) of parent compound N and designed compounds N1-N10, Theoretical and experimental values of selected bond angle (degree) of parent compound N and designed compounds N1-N10, Polar representation of HRS intensity in atomic unit (a.u.) as a function of polarization angle  $\psi$  for dynamic case (a) 1064 nm for compounds N1-N10 (b) 1907 nm for compounds N and N1-N10 in gas phase, Static and Dynamic HRS hyperpolarizability ( $\beta_{HRS} \times 10^{-30}$  esu) and Depolarization Ratio (DR) for parent compound N and designed compounds N1-N10 computed at DFT-B3LYP/6-311G(d p) level in gas phase.

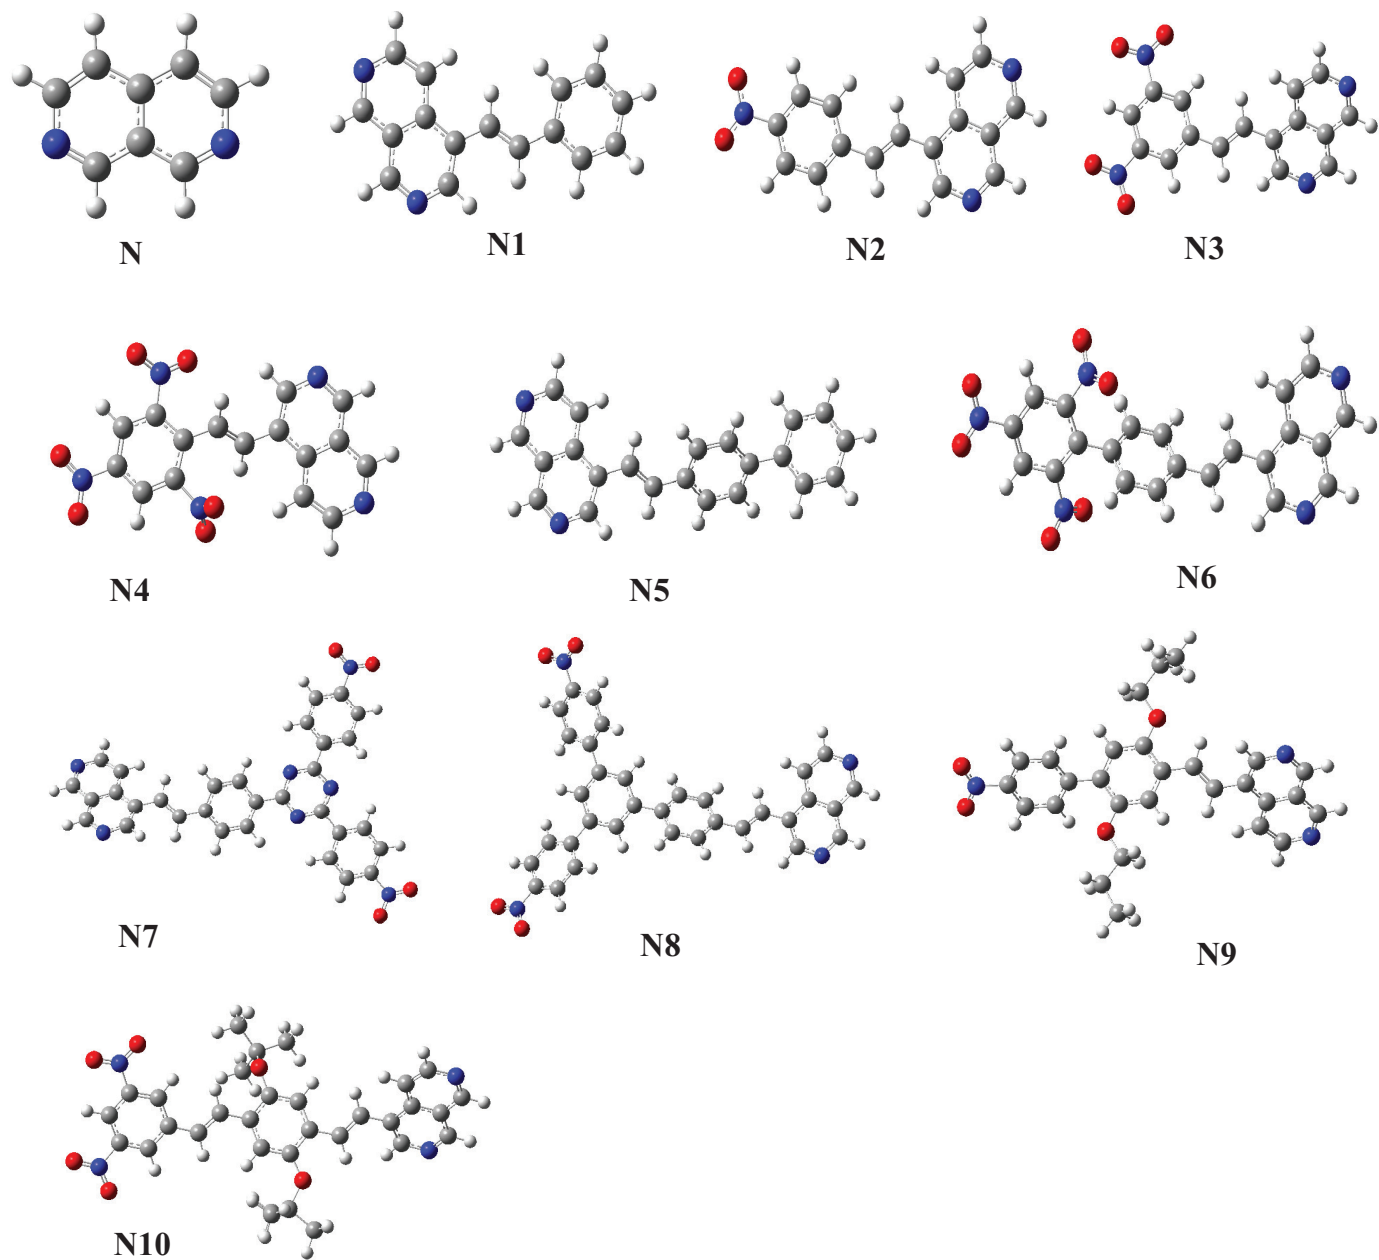

Fig. 1 Optimised geometry of parent compound N and designed compounds N1-N10.



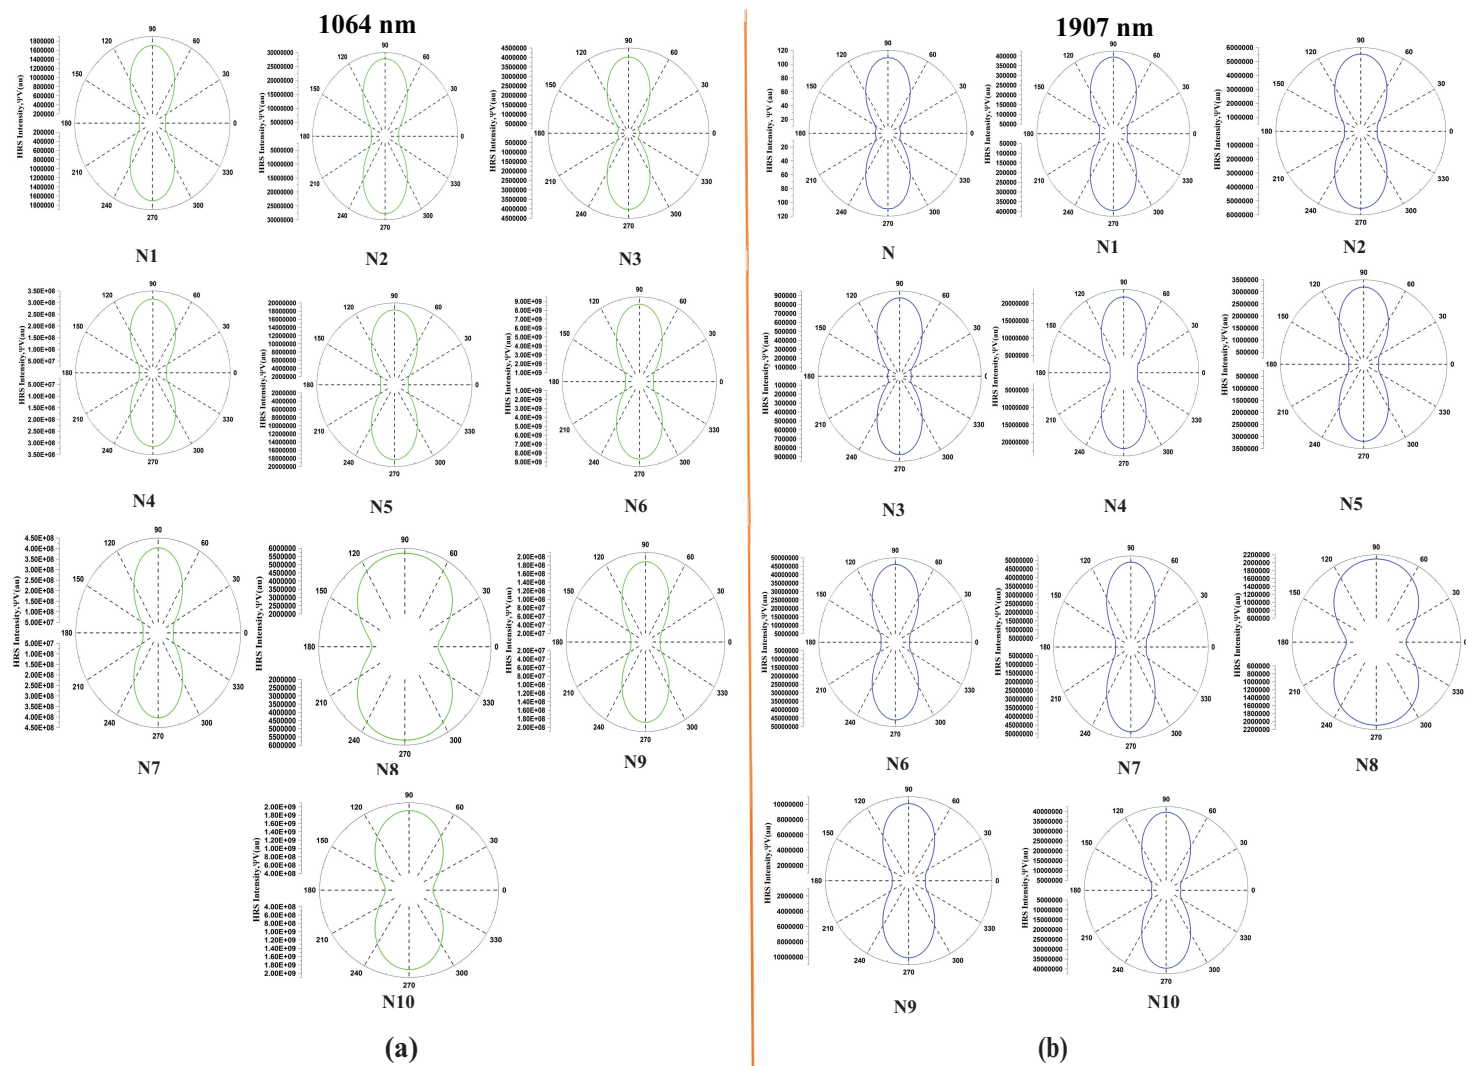

Fig. 2 Polar representation of HRS intensity in atomic unit (a.u.) as a function of polarization angle  $\psi$  for dynamic case (a) 1064 nm for compounds N1-N10 (b) 1907 nm for compounds N and N1-N10 in gas phase.

Table 3 Static and Dynamic HRS hyperpolarizability ( $\beta_{HRS} \times 10^{-30}$  esu) and Depolarization Ratio (DR) for parent compound N and designed compounds N1-N10 computed at DFT-B3LYP/6-311G(d,p) level in gas phase

| Compound | $\beta_{HRS}^a$ | DR <sup>a</sup> | $\beta_{HRS}^b$ | DR <sup>b</sup> | $\beta_{HRS}^c$ | DR <sup>c</sup> |
|----------|-----------------|-----------------|-----------------|-----------------|-----------------|-----------------|
| N        | 0.09            | 7.61            | 0.08            | 1.46            | 0.09            | 5.69            |
| N1       | 4.58            | 4.97            | 12.31           | 5.21            | 5.94            | 5.06            |
| N2       | 16.95           | 4.70            | 49.99           | 4.88            | 22.36           | 4.76            |
| N3       | 6.76            | 5.97            | 18.66           | 6.31            | 8.72            | 6.08            |
| N4       | 30.71           | 4.91            | 167.99          | 5.03            | 44.27           | 4.97            |
| N5       | 12.51           | 4.99            | 40.44           | 5.09            | 16.92           | 5.03            |
| N6       | 39.49           | 4.81            | 881.61          | 4.99            | 64.36           | 4.88            |
| N7       | 48.03           | 4.62            | 190.55          | 4.88            | 66.57           | 4.70            |
| N8       | 12.07           | 2.74            | 24.45           | 2.46            | 14.64           | 2.68            |
| N9       | 20.36           | 4.50            | 130.32          | 4.81            | 30.27           | 4.60            |
| N10      | 37.83           | 5.18            | 429.59          | 3.41            | 59.40           | 5.19            |

<sup>a</sup> Static, <sup>b</sup> Dynamic (1064 nm), <sup>c</sup> Dynamic (1907 nm)
